# Supplementary material
Source: publisher site journal article supplement (https://www.dovepress.com/article/491661)
Supplement: Supplementary file 1 [file get_supplementary_file.php]

Table S1 The 616 gene list

| ABCB1 | ATRX | BTK | CDK6 | CYP2C8 | EPAS1 | FAM58A (CCNQ) | FOXA1 | H3F3C | ID3 |
| --- | --- | --- | --- | --- | --- | --- | --- | --- | --- |
| ABCC4 | AURKA | FANCA | CDK8 | CYP2D6 | EPCAM | C11orf30 (EMSY) | FOXL2 | HAS3 | IDH1 |
| ABCC6 | AURKB | C8orf34 | CDKN1A | CYP3A5 | EPHA3 | FANCC | FOXO1 | HDAC1 | IDH2 |
| ABL1 | AXIN1 | CALR | CDKN1B | CYP4B1 | EPHA5 | FANCD2 | FOXP1 | HGF | IFNGR1 |
| ABL2 | AXIN2 | CAPG | CDKN2A | CYSLTR2 | EPHA7 | FANCE | FRS2 | HIST1H1C | IGF1 |
| ACTG1 | AXL | CARD11 | CDKN2B | DAXX | EPHB1 | FANCF | FUBP1 | HIST1H2BD | IGF1R |
| ACVR1 | B2M | CARM1 | CDKN2C | DCBLD1 | EPHB4 | FANCG | FYN | HIST1H3A | IGF2 |
| ACVR1B | BABAM1 | CASP7 | CEBPA | DCK | ERBB2 | FANCL | GABRA6 | HIST1H3B | IKBKE |
| AGO2 | BAP1 | CASP8 | CENPA | DCUN1D1 | ERBB3 | FAS | GATA1 | HIST1H3C | IKZF1 |
| AKT1 | BARD1 | CBFB | CHD2 | DDR1 | ERBB4 | FAT1 | GATA2 | HIST1H3D | IL10 |
| AKT2 | BBC3 | CBL | CHD4 | DDR2 | ERCC1 | FBXW7 | GATA3 | HIST1H3E | IL7R |
| AKT3 | BCL10 | CBR3 | CHEK1 | DICER1 | ERCC2 | FGD4 | GATA4 | HIST1H3F | INHA |
| ALK | BCL2 | CCND1 | CHEK2 | DIS3 | ERCC3 | FGF10 | GATA6 | HIST1H3G | INHBA |
| ALOX12B | BCL2L1 | CCND2 | CIC | DNAJB1 | ERCC4 | FGF12 | GGH | HIST1H3H | INPP4A |
| Amel | BCL2L11 | CCND3 | CREBBP | DNMT1 | ERCC5 | GID4 (C17orf39) | FGF14 | HIST1H3I | INPP4B |
| FGF19 | BCL2L2 | CCNE1 | CRKL | DNMT3A | ERF | AMER1 (FAM123B) | GLI1 | HIST1H3J | INPPL1 |
| ANKRD11 | BCL6 | CD22 | CRLF2 | DNMT3B | ERG | FGF23 | GNA11 | HIST2H3C | INSR |
| APC | BCOR | FGF3 | CSDE1 | DOT1L | ERRFI1 | CD274 (PD-L1) | GNA13 | HIST2H3D | IRF2 |
| AR | BCORL1 | CD276 | CSF1R | DPYD | ESR1 | FGF4 | GNAQ | HIST3H3 | IRF4 |
| ARAF | BCR | CD3EAP | CSF3R | DROSHA | ETV1 | FGF6 | GNAS | HLA-A | IRS1 |
| ARFRP1 | BIRC3 | CD70 | CTCF | DUSP4 | ETV4 | GPR124 (ADGRA2) | FGFR1 | HLA-B | IRS2 |
| ARID1A | BLM | CD74 | CTLA4 | E2F3 | ETV5 | FGFR2 | GPS2 | HLA-C | JAK1 |
| ARID1B | BMPR1A | CD79A | CTNNA1 | EED | ETV6 | FGFR3 | GREM1 | HLA-DQB1 | JAK2 |
| ARID2 | BRAF | CD79B | CTNNB1 | EGFL7 | EWSR1 | FGFR4 | GRIN2A | HLA-DRB1 | JAK3 |
| ARID5B | BRCA1 | CDA | CUL3 | EGFR | EXO1 | FH | GRM3 | HNF1A | JUN |
| ASXL1 | BRCA2 | CDC42 | CUL4A | EIF1AX | EZH1 | KAT6A (MYST3) | GSK3B | HOXB13 | FLCN |
| ASXL2 | BRD4 | CDC73 | CXCR4 | EIF4A2 | EZH2 | FLT1 | GSTA1 | HRAS | KDM5A |
| ATM | BRIP1 | CDH1 | CYLD | EIF4E | EZR | FLT3 | GSTP1 | HSD3B1 | KDM5C |
| ATP7A | BTG1 | CDK12 | CYP17A1 | ELF3 | FLT4 | FAM175A (ABRAXAS1) | H3F3A | HSP90AA1 | KDM6A |
| ATR | BTG2 | CDK4 | CYP19A1 | EP300 | FAM46C | FOLR3 | H3F3B | ICOSLG | KDR |
| WWTR1 | XIAP | XPC | XPO1 | XRCC1 | XRCC2 | YAP1 | YES1 | ZBTB2 | ZFHX3 |
| KEAP1 | MAPKAP1 | MYC | NUF2 | PIK3R1 | PTPRD | PARK2 (PRKN) | SH2B3 | SPOP | TIPARP |
| KEL | MAX | RNF43 | NUP93 | PIK3R2 | PTPRO | MYCL (MYCL1) | SH2D1A | SPRED1 | TMEM127 |
| KIT | MCL1 | MYCN | NUTM1 | PIK3R3 | PTPRS | TNFRSF14 | SHOC2 | SPTA1 | TMPRSS2 |
| KLF4 | MDC1 | MYD88 | OPRM1 | PIM1 | PTPRT | RPS6KA4 | SHQ1 | SRC | TNFAIP3 |
| KLHL6 | MDM2 | MYOD1 | P2RY8 | PLCG2 | QKI | RPS6KB2 | SLC10A2 | SRSF2 | ROS1 |
| KMT2A | MDM4 | NAT2 | PAK1 | PLK2 | RAB35 | RPTOR | SLC19A1 | STAG2 | TOP1 |
| RRAGC | MED12 | NBN | PAK3 | PMAIP1 | RAC1 | KMT2A (MLL) | SLC29A1 | STAT3 | TOP2A |
| KMT2B | MEF2B | NCOA3 | RRAS | PMS1 | RAC2 | PAK7 (PAK5) | SLC34A2 | STAT4 | TP53 |
| RRAS2 | MEN1 | NCOR1 | PALB2 | PMS2 | RAD21 | KMT2C (MLL3) | SLCO1B1 | STAT5A | TP53BP1 |
| RRM1 | MERTK | NEGR1 | RIT1 | PNRC1 | RAD50 | KMT2D (MLL2) | SLCO1B3 | STAT5B | TP63 |
| KNSTRN | MET | NF1 | PARP1 | POLD1 | RAD51 | RSPO2 | SLIT2 | STK11 | TRAF2 |
| KRAS | MGA | NF2 | PARP2 | POLE | RAD51B | RTEL1 | SLX4 | STK19 | TRAF7 |
| LATS1 | MITF | NFE2L2 | PARP3 | PPARG | RAD51C | RUNX1 | SMAD2 | STK40 | TSC1 |
| LATS2 | MKNK1 | NFKBIA | PAX5 | PPM1D | RAD51D | RUNX1T1 | SMAD3 | SUFU | TSC2 |
| LMO1 | MLH1 | NKX2-1 | PBRM1 | PPP2R1A | RAD52 | RXRA | SMAD4 | SUZ12 | TSHR |
| LRP1B | MPL | NKX3-1 | PDCD1 | PPP2R2A | RAD54L | RYBP | SMARCA4 | SYK | TSPY1 |
| LTK | SDHA | NOS3 | SDC4 | PPP4R2 | RAF1 | PDCD1LG2 (PD-L2) | SMARCB1 | TAF1 | TYMS |
| LYN | MSH2 | NOTCH1 | PDGFRA | PPP6C | RANBP2 | MRE11A (MRE11) | SMARCD1 | TAP1 | TYRO3 |
| LZTR1 | MSH3 | NOTCH2 | PDGFRB | PRDM1 | RARA | SDHAF2 | SMO | TAP2 | U2AF1 |
| MAF | MSH6 | NOTCH3 | PDK1 | PRDM14 | RASA1 | SDHB | SMYD3 | TBX3 | UBE2I |
| MAGI2 | MSI1 | NOTCH4 | PDPK1 | PREX2 | RB1 | TCEB1 (ELOC) | SNCAIP | SDHC | UGT1A3 |
| MALT1 | MSI2 | NPM1 | PGR | PRKAR1A | RBM10 | SDHD | SOCS1 | TCF3 | UMPS |
| SEMA3C | MST1 | NQO1 | PHOX2B | PRKCI | RECQL | MAP2K1 (MEK1) | SOD2 | TCF7L2 | UPF1 |
| SESN1 | MST1R | NRAS | PIK3C2B | PRKD1 | RECQL4 | MAP2K2 (MEK2) | SOS1 | TEK | VEGFA |
| MAP2K4 | MTAP | NSD1 | PIK3C2G | PRKDC | REL | HIST1H3F | SOX10 | TERC | VHL |
| MAP3K1 | MTHFR | NT5C2 | PIK3C3 | PRSS8 | RET | TERT (Promoter included) | SOX17 | SESN3 | VTCN1 |
| MAP3K13 | MTOR | NTHL1 | PIK3CA | PTCH1 | SETD2 | RFWD2 (COP1) | SOX2 | TET1 | SGK1 |
| MAP3K14 | MTR | NTRK1 | PIK3CB | PTEN | RHEB | SETD8 (KMT5A) | SOX9 | TET2 | SF3B1 |
| MAPK1 | MUTYH | NTRK2 | PIK3CD | PTP4A1 | RHOA | WHSC1L1 (NSD3) | SPEN | TGFBR1 | WISP3 |
| MAPK3 | MYB | NTRK3 | PIK3CG | PTPN11 | RICTOR | WHSC1 (NSD2) | SPG7 | TGFBR2 | WT1 |
| ZNF217 | ZNF703 | GATA3 | CTNNA1 | CSF1R | SESN2 |  |  |  |  |

Table S2 The Clinical Information

| Patients | Subtype | Sex | Age | Stage | TMB | PD-L1 |
| --- | --- | --- | --- | --- | --- | --- |
| 1 | adenocarcinoma | Female | <60 | III | 2.2 | 0 |
| 2 | adenocarcinoma | Male | >=60 | IV | 2.2 | 0 |
| 3 | adenocarcinoma | Male | <60 | IV | 2.9 | 0 |
| 4 | adenocarcinoma | Female | <60 | III | 4.4 | 0 |
| 5 | adenocarcinoma | Female | >=60 | IV | 4.4 | 0 |
| 6 | adenocarcinoma | Male | <60 | IV | 4.4 | 0 |
| 7 | adenocarcinoma | Female | <60 | IV | 5.1 | 0 |
| 8 | adenocarcinoma | Male | <60 | IV | 5.8 | 0 |
| 9 | adenocarcinoma | Male | >=60 | IV | 5.8 | 0 |
| 10 | adenocarcinoma | Male | <60 | IV | 6.5 | 0 |
| 11 | adenocarcinoma | Male | <60 | IV | 7.3 | 0 |
| 12 | adenocarcinoma | Female | <60 | IV | 7.9 | 0 |
| 13 | Squamous carcinoma | Male | >=60 | IV | 8 | 0 |
| 14 | adenocarcinoma | Male | >=60 | IV | 8 | 0 |
| 15 | adenocarcinoma | Female | >=60 | IV | 8.7 | 0 |
| 16 | adenocarcinoma | Male | >=60 | IV | 9.5 | 0 |
| 17 | Squamous carcinoma | Male | >=60 | III | 9.5 | 0 |
| 18 | adenocarcinoma | Female | >=60 | IV | 10.2 | 0 |
| 19 | adenocarcinoma | Female | <60 | IV | 12.4 | 0 |
| 20 | adenocarcinoma | Male | >=60 | IV | 12.4 | 0 |
| 21 | adenocarcinoma | Male | <60 | IV | 12.4 | 0 |
| 22 | adenocarcinoma | Male | <60 | IV | 13.1 | 0 |
| 23 | adenocarcinoma | Male | <60 | III | 13.1 | 0 |
| 24 | adenocarcinoma | Male | >=60 | III | 13.8 | 0 |
| 25 | Squamous carcinoma | Male | >=60 | IV | 15.3 | 0 |
| 26 | adenocarcinoma | Male | >=60 | IV | 15.3 | 0 |
| 27 | adenocarcinoma | Male | <60 | IV | 16 | 0 |
| 28 | adenocarcinoma | Female | <60 | IV | 16.7 | 0 |
| 29 | adenocarcinoma | Male | >=60 | IV | 19.6 | 0 |
| 30 | adenocarcinoma | Female | <60 | IV | 22.5 | 0 |
| 31 | adenocarcinoma | Female | >=60 | IV | 24.7 | 0 |
| 32 | adenocarcinoma | Male | <60 | IV | 26.9 | 0 |
| 33 | adenocarcinoma | Male | <60 | IV | 33.5 | 0 |
| 34 | Squamous carcinoma | Male | >=60 | IV | 33.5 | 0 |
| 35 | adenocarcinoma | Male | >=60 | III | 2.9 | 1 |
| 36 | adenocarcinoma | Female | <60 | IV | 5.1 | 1 |
| 37 | adenocarcinoma | Female | <60 | IV | 5.8 | 1 |
| 38 | adenocarcinoma | Male | <60 | IV | 7.3 | 1 |
| 39 | adenocarcinoma | Male | >=60 | IV | 8 | 1 |
| 40 | adenocarcinoma | Male | <60 | III | 8.7 | 1 |
| 41 | adenocarcinoma | Male | >=60 | IV | 9.5 | 1 |
| 42 | adenocarcinoma | Male | <60 | IV | 9.5 | 1 |
| 43 | adenocarcinoma | Female | <60 | IV | 10.2 | 1 |
| 44 | adenocarcinoma | Female | >=60 | IV | 10.9 | 1 |
| 45 | Squamous carcinoma | Male | >=60 | IV | 16 | 1 |
| 46 | adenocarcinoma | Male | >=60 | IV | 2 | 2 |
| 47 | adenocarcinoma | Female | <60 | IV | 7.3 | 2 |
| 48 | adenocarcinoma | Female | >=60 | IV | 6.5 | 2.5 |
| 49 | adenocarcinoma | Female | >=60 | IV | 1.5 | 3 |
| 50 | adenocarcinoma | Female | >=60 | IV | 2.2 | 3 |
| 51 | adenocarcinoma | Female | <60 | IV | 5.1 | 3 |
| 52 | adenocarcinoma | Female | >=60 | IV | 5.1 | 3 |
| 53 | adenocarcinoma | Male | <60 | III | 6.5 | 3 |
| 54 | adenocarcinoma | Female | <60 | IV | 7.3 | 3 |
| 55 | adenocarcinoma | Male | >=60 | IV | 11.6 | 3 |
| 56 | Squamous carcinoma | Male | >=60 | IV | 14.5 | 3 |
| 57 | adenocarcinoma | Female | >=60 | IV | 14.5 | 3 |
| 58 | adenocarcinoma | Male | >=60 | IV | 16 | 3 |
| 59 | adenocarcinoma | Male | >=60 | IV | 6.5 | 3.5 |
| 60 | adenocarcinoma | Female | <60 | IV | 14.5 | 3.5 |
| 61 | adenocarcinoma | Female | >=60 | IV | 3.6 | 5 |
| 62 | adenocarcinoma | Female | >=60 | III | 4.4 | 5 |
| 63 | adenocarcinoma | Male | >=60 | IV | 5.1 | 5 |
| 64 | adenocarcinoma | Male | >=60 | III | 5.1 | 5 |
| 65 | adenocarcinoma | Male | <60 | IV | 6.5 | 5 |
| 66 | adenocarcinoma | Female | <60 | IV | 7.3 | 5 |
| 67 | adenocarcinoma | Female | >=60 | III | 8 | 5 |
| 68 | adenocarcinoma | Female | >=60 | IV | 8 | 5 |
| 69 | adenocarcinoma | Male | <60 | IV | 9.5 | 5 |
| 70 | adenocarcinoma | Female | >=60 | IV | 10.2 | 5 |
| 71 | adenocarcinoma | Male | >=60 | IV | 10.9 | 5 |
| 72 | adenocarcinoma | Male | >=60 | IV | 12.4 | 5 |
| 73 | adenocarcinoma | Male | <60 | IV | 12.4 | 5 |
| 74 | Squamous carcinoma | Male | >=60 | IV | 13.1 | 5 |
| 75 | adenocarcinoma | Female | >=60 | IV | 13.8 | 5 |
| 76 | Squamous carcinoma | Male | <60 | IV | 15.3 | 5 |
| 77 | adenocarcinoma | Male | >=60 | IV | 20.4 | 5 |
| 78 | adenocarcinoma | Male | <60 | IV | 35.6 | 5 |
| 79 | Squamous carcinoma | Male | >=60 | IV | 44.4 | 5 |
| 80 | adenocarcinoma | Female | >=60 | IV | 3.6 | 7.5 |
| 81 | adenocarcinoma | Female | >=60 | IV | 4.4 | 8 |
| 82 | adenocarcinoma | Male | <60 | III | 16.7 | 8 |
| 83 | adenocarcinoma | Male | >=60 | III | 5.1 | 10 |
| 84 | adenocarcinoma | Male | >=60 | IV | 5.1 | 10 |
| 85 | adenocarcinoma | Female | >=60 | IV | 8 | 10 |
| 86 | adenocarcinoma | Male | >=60 | IV | 13.8 | 10 |
| 87 | adenocarcinoma | Male | >=60 | IV | 23.3 | 10 |
| 88 | adenocarcinoma | Male | <60 | IV | 0.7 | 15 |
| 89 | adenocarcinoma | Female | >=60 | III | 3.6 | 15 |
| 90 | adenocarcinoma | Female | <60 | IV | 9.5 | 15 |
| 91 | adenocarcinoma | Female | >=60 | IV | 9.5 | 15 |
| 92 | adenocarcinoma | Female | <60 | IV | 10.9 | 15 |
| 93 | adenocarcinoma | Male | >=60 | IV | 4.4 | 18 |
| 94 | adenocarcinoma | Male | >=60 | IV | 5.1 | 20 |
| 95 | adenocarcinoma | Male | <60 | III | 7.3 | 20 |
| 96 | adenocarcinoma | Female | <60 | IV | 7.3 | 20 |
| 97 | adenocarcinoma | Male | >=60 | IV | 8 | 20 |
| 98 | adenocarcinoma | Female | <60 | IV | 18.2 | 20 |
| 99 | adenocarcinoma | Male | >=60 | IV | 18.9 | 20 |
| 100 | adenocarcinoma | Female | <60 | III | 2.2 | 30 |
| 101 | Squamous carcinoma | Male | <60 | III | 7.3 | 30 |
| 102 | adenocarcinoma | Male | >=60 | III | 8.7 | 30 |
| 103 | adenocarcinoma | Male | <60 | III | 18.2 | 30 |
| 104 | adenocarcinoma | Male | >=60 | IV | 21.1 | 30 |
| 105 | Squamous carcinoma | Female | >=60 | IV | 22.5 | 30 |
| 106 | adenocarcinoma | Male | <60 | IV | 39.3 | 30 |
| 107 | adenocarcinoma | Male | <60 | III | 8.7 | 35 |
| 108 | adenocarcinoma | Male | <60 | IV | 21.1 | 35 |
| 109 | adenocarcinoma | Female | >=60 | IV | 8.7 | 40 |
| 110 | adenocarcinoma | Male | <60 | IV | 1.5 | 45 |
| 111 | adenocarcinoma | Female | <60 | IV | 3.6 | 45 |
| 112 | adenocarcinoma | Male | >=60 | III | 5.1 | 50 |
| 113 | adenocarcinoma | Female | >=60 | IV | 5.1 | 50 |
| 114 | adenocarcinoma | Female | <60 | III | 7.3 | 50 |
| 115 | adenocarcinoma | Female | >=60 | IV | 16 | 50 |
| 116 | Squamous carcinoma | Male | >=60 | IV | 25.5 | 50 |
| 117 | adenocarcinoma | Female | <60 | IV | 14.5 | 55 |
| 118 | adenocarcinoma | Male | <60 | IV | 32 | 55 |
| 119 | adenocarcinoma | Male | <60 | IV | 3.6 | 60 |
| 120 | adenocarcinoma | Female | <60 | IV | 8.7 | 60 |
| 121 | Squamous carcinoma | Male | >=60 | III | 8.7 | 60 |
| 122 | adenocarcinoma | Male | >=60 | IV | 1.5 | 65 |
| 123 | adenocarcinoma | Female | >=60 | IV | 2.2 | 65 |
| 124 | adenocarcinoma | Male | >=60 | IV | 3.6 | 65 |
| 125 | Squamous carcinoma | Male | >=60 | IV | 20.4 | 65 |
| 126 | adenocarcinoma | Female | <60 | IV | 2.2 | 70 |
| 127 | adenocarcinoma | Female | >=60 | IV | 16.7 | 70 |
| 128 | adenocarcinoma | Female | >=60 | IV | 4.4 | 75 |
| 129 | adenocarcinoma | Female | <60 | IV | 5.8 | 75 |
| 130 | adenocarcinoma | Female | >=60 | IV | 10.9 | 75 |
| 131 | adenocarcinoma | Female | <60 | IV | 5.1 | 80 |
| 132 | adenocarcinoma | Male | <60 | IV | 5.8 | 80 |
| 133 | Squamous carcinoma | Male | >=60 | III | 11.6 | 80 |
| 134 | Squamous carcinoma | Male | >=60 | IV | 16 | 80 |
| 135 | Squamous carcinoma | Male | >=60 | IV | 18.2 | 80 |
| 136 | adenocarcinoma | Female | <60 | IV | 2.2 | 85 |
| 137 | adenocarcinoma | Male | <60 | IV | 5.8 | 85 |
| 138 | adenocarcinoma | Male | >=60 | III | 7.3 | 85 |
| 139 | Squamous carcinoma | Male | <60 | IV | 8.7 | 85 |
| 140 | adenocarcinoma | Male | >=60 | IV | 1.5 | 90 |
| 141 | adenocarcinoma | Male | >=60 | IV | 2.2 | 90 |
| 142 | adenocarcinoma | Male | >=60 | IV | 2.9 | 95 |
| 143 | adenocarcinoma | Female | >=60 | IV | 11.6 | 95 |
| 144 | adenocarcinoma | Male | >=60 | IV | 0.7 | 100 |
| 145 | adenocarcinoma | Female | >=60 | III | 2.2 | 100 |
| 146 | adenocarcinoma | Male | <60 | IV | 5.8 | 100 |
| 147 | adenocarcinoma | Male | <60 | III | 8 | 100 |
| 148 | adenocarcinoma | Male | >=60 | III | 12.4 | 100 |
| 149 | adenocarcinoma | Male | <60 | IV | 13.8 | 100 |
| 150 | adenocarcinoma | Female | <60 | IV | 15.3 | 100 |
| 151 | adenocarcinoma | Male | >=60 | III | 23.3 | 100 |
| 152 | adenocarcinoma | Female | >=60 | III | 4.4 | < 1 |
| 153 | adenocarcinoma | Female | >=60 | IV | 2.2 | NA |
| 154 | adenocarcinoma | Male | <60 | III | 3.6 | NA |
| 155 | adenocarcinoma | Male | >=60 | IV | 3.6 | NA |
| 156 | adenocarcinoma | Male | >=60 | IV | 5.8 | NA |
| 157 | Squamous carcinoma | Male | >=60 | IV | 5.8 | NA |
| 158 | adenocarcinoma | Male | >=60 | IV | 5.8 | NA |
| 159 | adenocarcinoma | Male | >=60 | III | 7.3 | NA |
| 160 | adenocarcinoma | Female | >=60 | IV | 8.7 | NA |
| 161 | Squamous carcinoma | Male | >=60 | IV | 12.4 | NA |
| 162 | adenocarcinoma | Male | >=60 | III | 13.8 | NA |
| 163 | adenocarcinoma | Female | >=60 | IV | 14.5 | NA |
| 164 | adenocarcinoma | Male | >=60 | IV | 15.3 | NA |
| 165 | adenocarcinoma | Male | <60 | IV | 15.3 | NA |
| 166 | adenocarcinoma | Female | <60 | IV | 20.4 | NA |


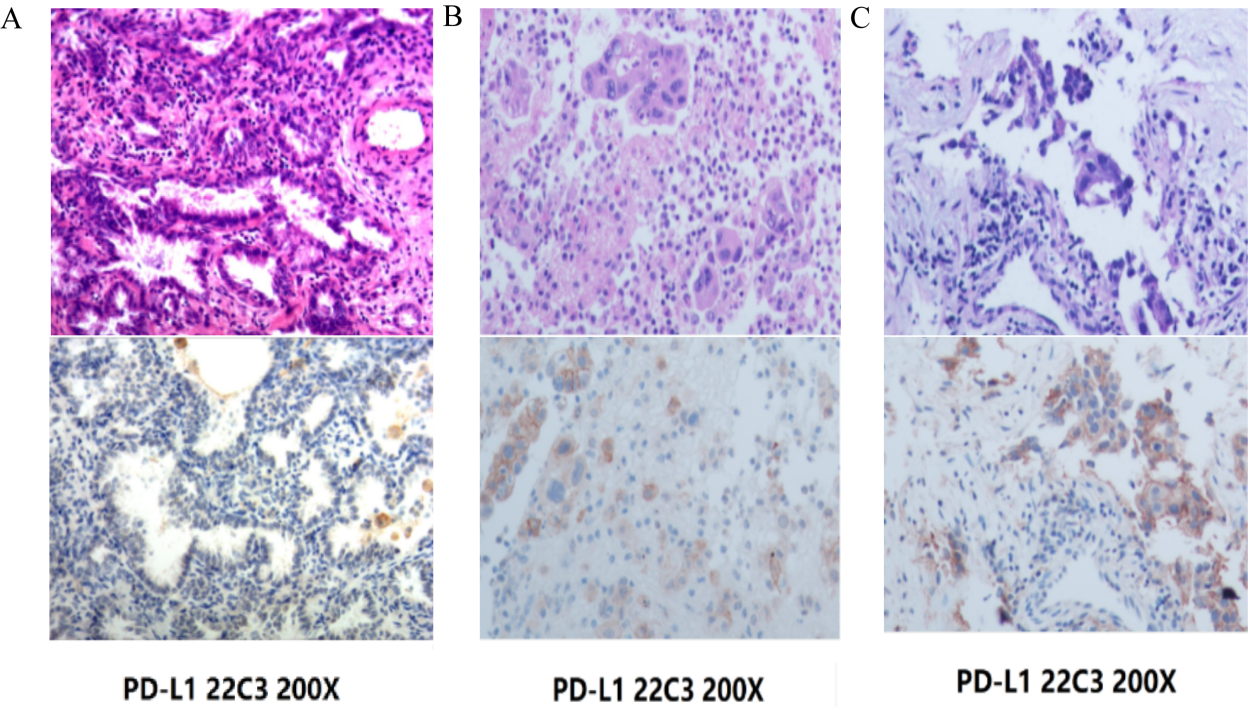


Figure S1 PD-L1 IHC staining results. A PD-L1<1%; B PD-L1≥ 50%; C 50%≥ PD-L1≥1%


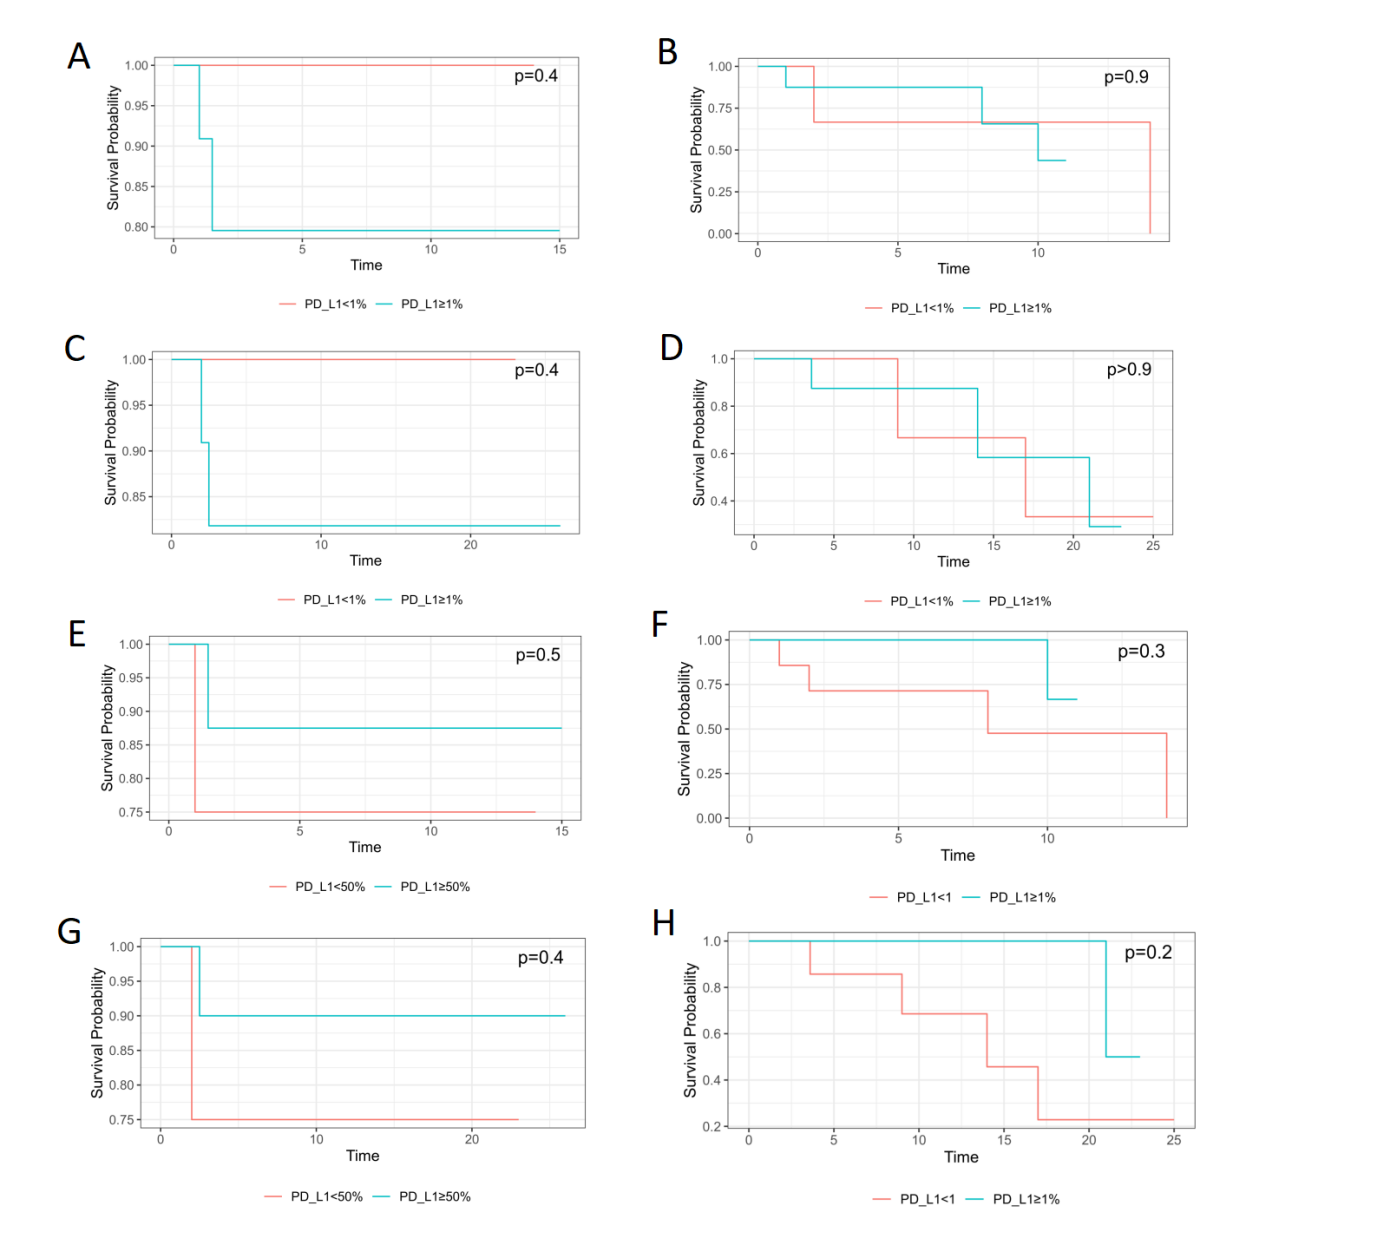


Figure S2 The survival of LUAD and LUSC according to PD-L1 expression. A PFS analysis of PD-L1≥1 and PD-L1<1 in patients with LUAD. B OS analysis of PD-L1≥1 and PD-L1<1 in patients with LUAD. C PFS analysis of PD-L1≥1 and PD-L1<1 in patients with LUSC. D OS analysis of PD-L1≥1 and PD-L1<1 in patients with LUSC. E PFS analysis of PD-L1≥50 and PD-L1<50 in patients with LUAD. F OS analysis of PD-L1≥50 and PD-L1<50 in patients with LUAD. G PFS analysis of PD-L1≥50 and PD-L1<50 in patients with LUSC. H OS analysis of PD-L1≥50 and PD-L1<50 in patients with LUSC.
